# Supplementary material for: Development and Validation of a Knowledge, Attitude and Practice Questionnaire on Antibiotic Use in Arabic and French Languages in Lebanon
Source: MDPI journal article supplement (doi:10.3390/ijerph19020687), 2022-01-08
Supplement: s1 [file s1]

Pour choisir une réponse, veuillez remplir **COMPLÈTEMENT** le(s) cercle(s) correspondant(s): CORRECTEMENT répondu: ●

INCORRECTEMENT répondu: ⊗ ⊘

Veuillez répondre aux questions suivantes sur les **ANTIBIOTIQUES** (Amoxicillin, Cefixime, Ciproflaxin, Levoflaxin, Penicillin, etc...)

Sur une échelle de 0 à 10 points, sélectionnez un chiffre représentant votre niveau d'accord avec les affirmations ci-dessous. "0" (zéro) veut dire que vous n'êtes pas du tout d'accord et "10" représente un accord maximum.

Veuillez indiquer votre niveau d'accord **QUE VOUS** utilisiez des *antibiotiques* **OU PAS**

Exemple: Faire du sport est bénéfique pour la santé ○ ○ ○ ○ ○ ○ ○ ○ ● ○ ○

|                                                                                                                                                              | Pas d'accord            | D'accord |
|--------------------------------------------------------------------------------------------------------------------------------------------------------------|-------------------------|----------|
|                                                                                                                                                              | ←                       | →        |
| 1. Les <i>antibiotiques</i> sont efficaces contre les virus                                                                                                  | ○ ○ ○ ○ ○ ○ ○ ○ ○ ○ ○ ○ |          |
| 2. Quand je suis enrhumé(e) ou j'ai une grippe, je prends des <i>antibiotiques</i> pour m'aider à me sentir mieux plus vite                                  | ○ ○ ○ ○ ○ ○ ○ ○ ○ ○ ○ ○ |          |
| 3. Si je me sens mieux après quelques jours de prise d' <i>antibiotiques</i> , il m'arrive d'arrêter mon traitement avant de le finir                        | ○ ○ ○ ○ ○ ○ ○ ○ ○ ○ ○ ○ |          |
| 4. J'attends de mon médecin qu'il me prescrive des <i>antibiotiques</i> quand j'ai des symptômes de rhume ou une grippe                                      | ○ ○ ○ ○ ○ ○ ○ ○ ○ ○ ○ ○ |          |
| 5. Il est bon de pouvoir obtenir des <i>antibiotiques</i> de parents ou amis sans devoir voir un médecin                                                     | ○ ○ ○ ○ ○ ○ ○ ○ ○ ○ ○ ○ |          |
| 6. Quand j'ai un mal de gorge, je préfère prendre un <i>antibiotique</i>                                                                                     | ○ ○ ○ ○ ○ ○ ○ ○ ○ ○ ○ ○ |          |
| 7. Chaque type d'infection a besoin d'un <i>antibiotique</i> différent                                                                                       | ○ ○ ○ ○ ○ ○ ○ ○ ○ ○ ○ ○ |          |
| 8. Les <i>antibiotiques</i> peuvent tuer les bactéries qui vivent habituellement sur la peau et dans les intestins                                           | ○ ○ ○ ○ ○ ○ ○ ○ ○ ○ ○ ○ |          |
| 9. Si je ressens des effets secondaires durant un traitement d' <i>antibiotiques</i> , je dois arrêter de prendre le médicament dès que possible             | ○ ○ ○ ○ ○ ○ ○ ○ ○ ○ ○ ○ |          |
| 10. Je prends les <i>antibiotiques</i> en suivant les instructions du médecin                                                                                | ○ ○ ○ ○ ○ ○ ○ ○ ○ ○ ○ ○ |          |
| 11. Quand les <i>antibiotiques</i> sont consommés de façon excessive, ils n'auront plus d'effet au moment où l'on en a vraiment besoin                       | ○ ○ ○ ○ ○ ○ ○ ○ ○ ○ ○ ○ |          |
| 12. Je préfère garder des <i>antibiotiques</i> chez moi au cas où j'en aurais besoin plus tard                                                               | ○ ○ ○ ○ ○ ○ ○ ○ ○ ○ ○ ○ |          |
| 13. Je fais confiance au médecin s'il /si elle décide de prescrire ou pas des <i>antibiotiques</i>                                                           | ○ ○ ○ ○ ○ ○ ○ ○ ○ ○ ○ ○ |          |
| 14. Si je pense que j'ai besoin d'un <i>antibiotique</i> et que le médecin ne me le prescrit pas, je vais à la pharmacie pour me le procurer sans ordonnance | ○ ○ ○ ○ ○ ○ ○ ○ ○ ○ ○ ○ |          |
| 15. Les médecins expliquent souvent clairement au patient les raisons de prescrire ou de ne pas prescrire des <i>antibiotiques</i>                           | ○ ○ ○ ○ ○ ○ ○ ○ ○ ○ ○ ○ |          |
| 16. Les médecins expliquent souvent clairement au patient les instructions d'utilisation des <i>antibiotiques</i>                                            | ○ ○ ○ ○ ○ ○ ○ ○ ○ ○ ○ ○ |          |
| 17. Quand le patient achète un <i>antibiotique</i> , le pharmacien lui explique l'importance d'une bonne adhésion thérapeutique                              | ○ ○ ○ ○ ○ ○ ○ ○ ○ ○ ○ ○ |          |

**18. Au cours du mois dernier, avez-vous pris des *antibiotiques*?**

- ☐ Oui (passer à la question 19) ☐ Non (passer à la question 29)

**Veuillez répondre aux questions suivantes sur votre consommation des *ANTIBIOTIQUES AU COURS DU MOIS DERNIER***

**19. Quelle a été la durée de votre dernier traitement aux *antibiotiques*?**

Nombre de jours   Nombre de mois

**20. Qui vous a prescrit ou recommandé les *antibiotiques*? (Vous pouvez choisir plusieurs réponses)**

- ☐ Le médecin ☐ Des amis  
☐ La famille ☐ Le pharmacien  
☐ Je les avais chez moi

**21. Avez-vous pris jusqu'au bout votre dernier traitement aux *antibiotiques*?**

- ☐ Oui ☐ Non

**22. Qu'avez-vous fait des *antibiotiques* que vous n'avez pas utilisés? (Vous pouvez choisir plusieurs réponses)**

- ☐ Je les ai gardés pour les utiliser la prochaine fois que je suis malade  
☐ Je m'en suis débarrassé(e) dans la poubelle ou les eaux usées  
☐ Je les ai donnés à quelqu'un d'autre  
☐ Il ne me restait plus d'*antibiotique*

**23. Au cours de votre dernier traitement aux *antibiotiques*, vous est-il arrivé d'oublier de les prendre?**

- ☐ Jamais (passer à la question 25)  
☐ Parfois (passer à la question 24)  
☐ Souvent (passer à la question 24)

**24. Qu'avez-vous fait quand vous avez oublié de prendre une dose de vos *antibiotiques*?**

- ☐ J'ai continué de prendre les doses suivantes normalement  
☐ J'ai doublé/augmenté la dose suivante  
☐ Je l'ai prise dès que je m'en suis souvenu(e)

**25. Au cours de votre dernier traitement aux *antibiotiques*, avez-vous changé la dose sur votre propre décision (sans avis médical)?**

- ☐ Jamais (passer à la question 29)  
☐ Parfois (passer à la question 26)  
☐ Souvent (passer à la question 26)

**26. Comment avez-vous vous-même changé votre dose d'*antibiotiques* (sans avis médical)?**

- ☐ J'en ai pris plus (passer à la question 27 puis 29)  
☐ J'en ai pris moins (passer à la question 28)  
☐ Parfois j'en ai pris plus et parfois moins (passer à la question 27 puis 28)

**27. Pourquoi avez-vous vous-même décidé d'augmenter votre dose d'*antibiotiques* (sans avis médical)? (vous pouvez choisir plusieurs réponses)**

- ☐ J'ai oublié de prendre la dose précédente  
☐ Je me suis senti(e) très malade  
☐ Je n'ai pas senti de réelle amélioration  
☐ J'ai senti une amélioration mais voulais me sentir encore mieux

**28. Pourquoi avez-vous décidé vous-même de réduire votre dose d'*antibiotiques* (sans avis médical)? (vous pouvez choisir plusieurs réponses)**

- ☐ J'avais peur des effets secondaires  
☐ J'étais fatigué(e) et j'ai oublié  
☐ J'ai pensé que j'en prenais trop  
☐ J'étais pressé(e) et j'ai oublié  
☐ Je n'aime pas prendre de médicaments la nuit  
☐ Je me sentais mieux

Code du questionnaire: \_\_\_\_\_

Date: \_\_\_\_\_

Caractéristiques Démographiques Générales

29. Indiquez votre sexe ☐ Homme ☐ Femme

30. Quelle est votre date de naissance? (Veuillez inscrire les chiffres dans les espaces alloués)

|      |  |      |  |       |  |  |  |
|------|--|------|--|-------|--|--|--|
|      |  |      |  |       |  |  |  |
| Jour |  | Mois |  | Année |  |  |  |

Quel est votre niveau d'éducation académique.

- ☐ Je n'ai pas été à l'école
- ☐ Elémentaire/ Primaire (maternelle jusqu'à la 6<sup>ème</sup>)
- ☐ Complémentaire (5<sup>ème</sup> à la 3<sup>ème</sup>)
- ☐ Secondaire (2<sup>nde</sup> à la terminale)
- ☐ Universitaire

Actuellement, avez-vous une activité professionnelle?

- ☐ Oui ☐ Non

Qu'est-ce qui est couvert par votre assurance santé?

(Vous pouvez choisir plus d'une réponse).

- ☐ Je n'ai pas d'assurance santé
- ☐ Le coût ou une partie des coûts des consultations médicales
- ☐ Le coût ou une partie des coûts de mes médicaments

34. Veuillez indiquer votre statut marital:

- ☐ Marié(e) (passer à la question 35)
- ☐ Divorcé(e) (passer à la question 37)
- ☐ Veuf/Veuve (passer à la question 37)
- ☐ Séparé(e) de mon épouse/époux, mais non divorcé(e) (passer à la question 35)

35 Quel est le niveau d'éducation académique de votre épouse/époux?

- ☐ Il/Elle n'a pas été à l'école
- ☐ Elémentaire/ Primaire (maternelle jusqu'à la 6<sup>ème</sup>)
- ☐ Complémentaire (5<sup>ème</sup> à la 3<sup>ème</sup>)
- ☐ Secondaire (2<sup>nde</sup> à la terminale)
- ☐ Universitaire

6 Actuellement, votre épouse/époux travaille-t-il/elle?

- ☐ Oui ☐ Non

37 Combien de personnes vivent sous votre toit, inclus vous-même?

- ☐ 2 ☐ 3 – 4 ☐ 5 – 6 ☐ Plus de 6

38.Y a-t-il des instituts de santé, tels que des dispensaires ou hôpitaux, situés près de votre lieu de résidence?

- ☐ Oui ☐ Non

39. Quel est le total des revenus familiaux (quel est le revenu total perçu par tous les membres de la famille vivant sous le même toit)?

- ☐ Moins de 500US\$ par mois
- ☐ Entre 500 et 999US\$ par mois
- ☐ Entre 1000 et 1499US\$ par mois
- ☐ Entre 1500 et 1999US\$ par mois
- ☐ Entre 2000 et 2500US\$ par mois
- ☐ Plus de 2500US\$ par mois

40.Consultez-vous un médecin lorsque vous êtes malade?

- ☐ Jamais ☐ Rarement
- ☐ Parfois ☐ Toujours (passer à la question 42)

41. Quelle est la raison pour laquelle vous ne consultez pas toujours un médecin? (Vous pouvez choisir plus d'une réponse).

- ☐ Je n'ai pas besoin de médecin
- ☐ J'ai peur des médecins
- ☐ Par manque d'argent
- ☐ Je n'ai pas le temps de le consulter
- ☐ L'attente avant d'être examiné(e) est longue
- ☐ La clinique est située loin de ma maison

42.Avez-vous déjà reçu une prescription médicale par téléphone?

- ☐ Oui ☐ Non

Merci d'avoir participé à cette étude !
