# Supplementary material for: Development and Validation of a Knowledge, Attitude and Practice Questionnaire on Antibiotic Use in Arabic and French Languages in Lebanon
Source: MDPI journal article supplement (doi:10.3390/ijerph19020687), 2022-01-08
Supplement: s1 [file s1]

أجب بـ شكل خاطئ: ☐

أجب بـ شكل صحيح: ☒

يُرجى الإجابة على الأسئلة التالية حول المضادات الحيوية (مثلاً: أموكسيسيلين، سيفيكسيم، سيبروفلوكساسين، ليفوفلوكساسين، بنسلين، إلى آخره) ؟

على مقياس من "0" (صفر) إلى "10" (عشر) نقاط، اختر رقم يعبر عن درجة موافقتك على العبارات التالية، بحيث أن الرقم "0" (صفر) يعني إنك ترفض كلياً والرقم "10" (عشرة) يعني إنك توافق تماماً  
يُرجى تقييم العبارات التالية بصرف النظر عما إذا كنت تستخدم المضادات الحيوية أم لا

مثلاً: ممارسة الرياضة تُفيد الصحة 0 1 2 3 4 5 6 7 8 9 10

← لا أوافق أوافق →

10 9 8 7 6 5 4 3 2 1 0

١) المضادات الحيوية فعالة ضد الفيروسات

10 9 8 7 6 5 4 3 2 1 0

٢) عندما أصاب بنزلات البرد أو الإنفلونزا أتناول المضادات الحيوية لمساعدتي على التحسن بشكل أسرع

10 9 8 7 6 5 4 3 2 1 0

٣) إذا شعرت بالتحسن بعد بضعة أيام، أتوقف أحياناً عن تناول المضادات الحيوية قبل انتهاء فترة العلاج

10 9 8 7 6 5 4 3 2 1 0

٤) أتوقع أن يصف لي الطبيب المضادات الحيوية إذا كنت أشعر بعوارض نزلات البرد أو الإنفلونزا

10 9 8 7 6 5 4 3 2 1 0

٥) من الجيد أن تكون قادراً على الحصول على المضادات الحيوية من الأقارب أو الأصدقاء دون الحاجة إلى زيارة الطبيب

10 9 8 7 6 5 4 3 2 1 0

٦) عندما أشعر بالتهاب في الحلق، أفضل استخدام مضاد حيوي

10 9 8 7 6 5 4 3 2 1 0

٧) كل نوع من الالتهاب يحتاج إلى نوع مختلف من المضادات الحيوية

10 9 8 7 6 5 4 3 2 1 0

٨) المضادات الحيوية تقتل البكتيريا التي تعيش عادةً على الجلد أو في المصّران

10 9 8 7 6 5 4 3 2 1 0

٩) إذا شعرت بآثار جانبية خلال فترة العلاج بالمضادات الحيوية يجب أن أتوقف عن استعماله في أقرب وقت ممكن

10 9 8 7 6 5 4 3 2 1 0

١٠) أستعمل المضادات الحيوية حسب تعليمات الطبيب

10 9 8 7 6 5 4 3 2 1 0

١١) إذا تمّ إستهلاك المضادات الحيوية بكثرة، فلن تنفع عند الحاجة إليها حقاً

10 9 8 7 6 5 4 3 2 1 0

١٢) أفضل أن أبقى مضادات حيوية إضافية في المنزل، في حال الحاجة إليها لاحقاً

10 9 8 7 6 5 4 3 2 1 0

١٣) أثق بقرار الطبيب سواء قرّر وصف أو عدم وصف المضادات الحيوية

10 9 8 7 6 5 4 3 2 1 0

١٤) إذا كنت أعتقد أنني بحاجة إلى المضادات الحيوية ولم يصفها الطبيب، سأحصل عليها من الصيدلية بدون وصفة

10 9 8 7 6 5 4 3 2 1 0

١٥) غالباً ما يشرح الأطباء بوضوح للمريض أسباب وصف أو عدم وصف المضادات الحيوية

10 9 8 7 6 5 4 3 2 1 0

١٦) غالباً ما يشرح الأطباء بوضوح للمريض كيفية استخدام المضادات الحيوية

10 9 8 7 6 5 4 3 2 1 0

١٧) عند شراء المضادات الحيوية، يبلغك الصيدلاني عن أهمية التقيد الصحيح بالعلاج

١٨ في الشهر الماضي، هل إستعملت المضادات الحيوية؟ ☐ نعم (رجاء إنتقل إلى السؤال ١٩) ☐ كلا (رجاء إنتقل إلى السؤال ٢٩)

**أجب على الأسئلة التالية عن إستهلاكك من المضادات الحيوية في الشهر الماضي**

١٩ كم كانت مدة آخر علاج بالمضادات الحيوية؟

عدد الأيام:  عدد الأشهر:

٢٠ من الذي وصف لك أو نصحك باستخدام المضادات الحيوية؟  
(بإمكانك إختيار أكثر من إجابة)

☐ الطبيب ☐ الأصدقاء ☐ العائلة

☐ الصيدلاني ☐ كان عندي في المنزل

٢١ في آخر مرة كان عليك أن تتناول المضادات الحيوية، هل أكملت كل دورة العلاج؟

☐ نعم ☐ كلا

٢٢ ماذا فعلت بالمضادات الحيوية التي تركت دون إستعمال؟ (بإمكانك إختيار أكثر من إجابة)

☐ احتفظت بها لكي أستعملها عندما أمرض في المرة القادمة

☐ رميتها في الزباله أو في مياه الصرف الصحي

☐ أعطيتها لأحد

☐ لم يتبقى لدي أي مضادات حيوية

٢٣ في آخر مرة كان عليك أن تتناول المضادات الحيوية، هل نسيت أن تأخذ أي من الجرعات؟

☐ أبداً (رجاء إنتقل إلى السؤال ٢٥)

☐ أحياناً (رجاء إنتقل إلى السؤال ٢٤)

☐ في كثير من الأحيان (رجاء إنتقل إلى السؤال ٢٤)

٢٤ ماذا فعلت عندما تخطيت/لم تتناول جرعة من المضادات الحيوية؟

☐ تابعت الجرعات التالية بشكل طبيعي

☐ ضاعفت أو زدت الجرعة الثانية

☐ تناولتها عندما تذكرت

٢٥ في آخر مرة كان عليك أن تتناول المضادات الحيوية، هل قمت بتغيير عيار الجرعة من تلقاء نفسك (بدون إستشارة طبيبة)؟

☐ أبداً (رجاء إنتقل إلى السؤال ٢٩)

☐ أحياناً (رجاء إنتقل إلى السؤال ٢٦)

☐ في كثير من الأحيان (رجاء إنتقل إلى السؤال ٢٦)

٢٦ ماذا فعلت عندما غيرت عيار المضادات الحيوية من تلقاء نفسك (بدون إستشارة طبيبة)؟

☐ تناولت منها أكثر (رجاء إنتقل إلى السؤال ٢٧ ومن ثم إلى السؤال ٢٩)

☐ تناولت منها أقل (رجاء إنتقل إلى السؤال ٢٨)

☐ أحياناً تناولت منها أكثر وأحياناً أخرى أقل (رجاء أجب على السؤالين ٢٧ و ٢٨)

٢٧ لماذا قمت بزيادة عيار جرعة المضادات الحيوية من تلقاء نفسك (بدون إستشارة طبيبة)؟ (بإمكانك إختيار أكثر من إجابة)

☐ نسيت أن أتناول الجرعة السابقة

☐ شعرت بأنني مريض جداً

☐ لم أشعر بتحسّن ملحوظ

☐ تحسّنت ولكن أردت أن أتحسّن أكثر

٢٨ لماذا قمت بتخفيض عيار جرعة المضادات الحيوية من تلقاء نفسك (بدون إستشارة طبيبة)؟ (بإمكانك إختيار أكثر من إجابة)

☐ كنت قلقاً من آثار الدواء الجانبيّة

☐ كنت متعباً ونسيت

☐ شعرت بأنني أتناول الكثير من الدواء

☐ كنت على عجلة ونسيت

☐ لا أحب تناول الأدوية في الليل

☐ شعرت بتحسّن
